# Supplementary material for: Topochemical transformation of Co(ii) coordination polymers to Co3O4 nanoplates for high-performance lithium storage
Source: Royal Society of Chemistry journal article supplement (doi:10.1039/c4ta05041j), 2014-12-03
Supplement: c4ta05041j1.pdf [file c4ta05041j1.pdf]

## Supplementary Information

---

### **Co<sub>3</sub>O<sub>4</sub> nanoplate topochemically transformed from Co(II) coordination polymers with fast and stable reversible lithium storage**

**Jinxue Guo, Bin Jiang, Yaping Xie, Xiao Zhang\*, Yong-hong Wen\***

Laboratory of Inorganic Synthesis and Applied Chemistry, Key Laboratory of Sensor Analysis of  
Tumor Marker ( Ministry of Education), College of Chemistry and Molecular Engineering, Qingdao  
University of Science and Technology, Qingdao 266042, PR China

E-mail: zhx1213@126.com (X. Zhang), wenyh@126.com (Y.H. Wen)

#### **Experimental Section**

##### ***Preparation of Co<sub>3</sub>O<sub>4</sub> nanoparticles***

CoCl<sub>2</sub>·6H<sub>2</sub>O (4.76 g), F127 (1.42 g), and urea (0.06 g) are dissolved into 50 mL of ethanol at room temperature. After ultrasonication for 30 min to reach well dispersion, the mixture is heated to 100 °C using an oil bath. After reaction for 8 h, the product of precursor is collected by centrifugation and washed with deionized (DI) water and ethanol several times after the solution is cooled down naturally. To obtain Co<sub>3</sub>O<sub>4</sub>, the resultant precursor product is loaded into a tube furnace and annealed at 400 °C for 3 h in air.

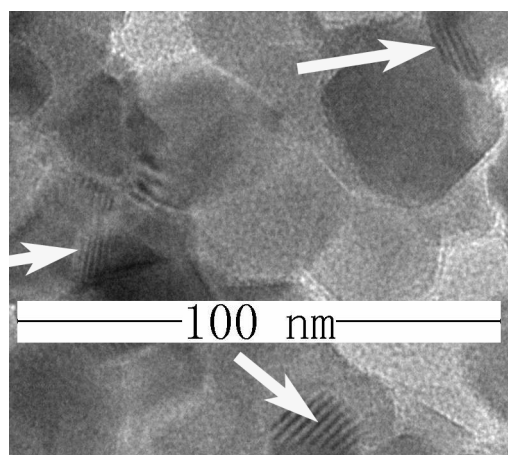

Fig. S1. Enlarged TEM image of Co<sub>3</sub>O<sub>4</sub> nanoplates.

## Supplementary Information

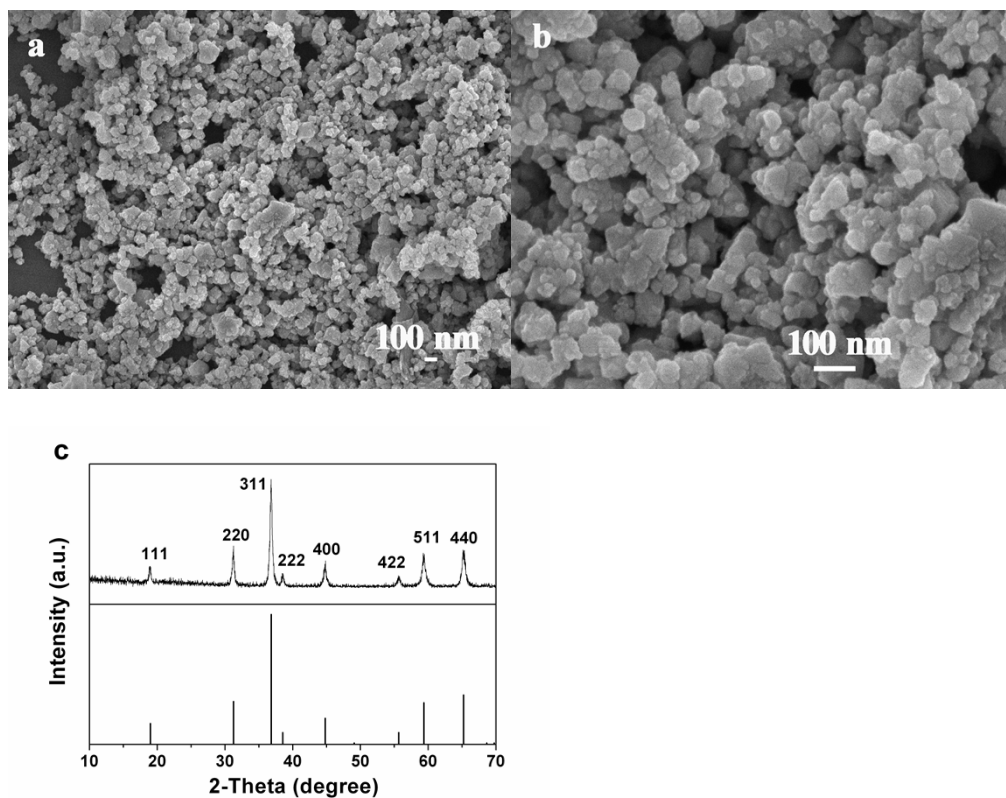

Figure S2. (a, b) Scanning electron microscope (SEM) images and (c) powder X-ray diffraction (XRD) pattern of  $\text{Co}_3\text{O}_4$  nanoparticles.

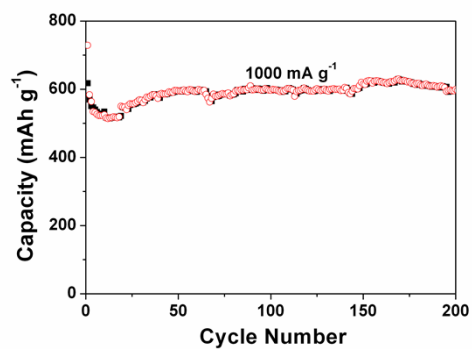

Figure S3. The cyclic performance of  $\text{Co}_3\text{O}_4$  nanoplates at a high rate of  $1000 \text{ mA g}^{-1}$ .
